# Supplementary material for: Trajectories of Response to Dorsolateral Prefrontal rTMS in Major Depression: A THREE-D Study
Source: Atypon-hosted journal article supplement (doi:10.1176/appi.ajp.2018.18091096), 2019-02-15

**CONSORT Flow Diagram**

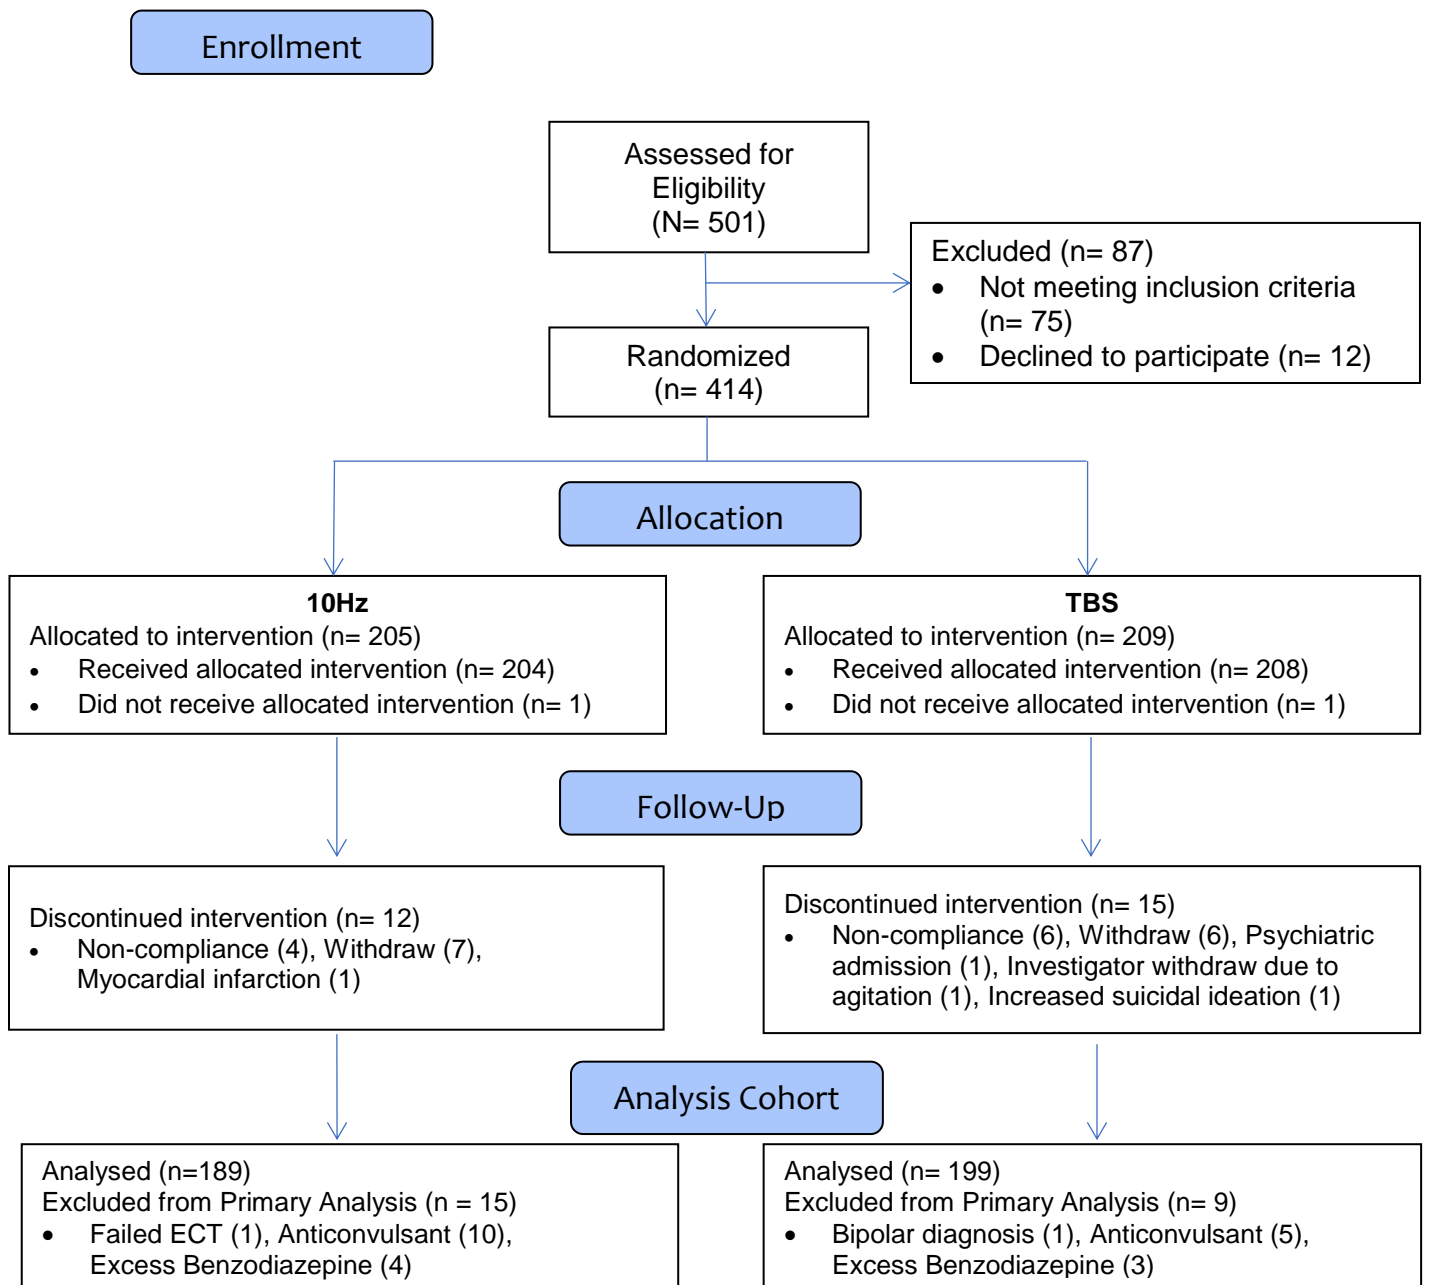

**TABLE S1.** Group trajectories comparing included (n=388) and excluded participants who violated inclusion criteria (n=24)

| <b>Response Trajectory</b>                | <b>Included participant (n=388)</b> | <b>Excluded participant (n=24)</b> |
|-------------------------------------------|-------------------------------------|------------------------------------|
| Rapid Response                            | 75 (19.3%)                          | 5 (20.8%)                          |
| Lower baseline symptoms, linear response  | 160 (41.2%)                         | 5 (20.8%)                          |
| Higher baseline symptoms, linear response | 113 (29.1%)                         | 4 (16.7%)                          |
| Nonresponse                               | 40 (10.3%)                          | 10 (42%)                           |

Note that response trajectory membership is slightly different for included participants due to impact of the excluded participants on the PROC TRAJ procedure.

**TABLE S2.** Characteristics associated with depressive symptom trajectories with benzodiazepine dose as continuous measure

| <b>Characteristic</b>           | <b>Rapid Response (n=73)<br/>OR (95% CI)</b> | <b>Lower baseline symptoms, linear response (n=154)<br/>OR (95% CI)</b> | <b>Higher baseline symptoms, linear response (n=118)<br/>OR (95% CI)</b> | <b>Non-response (n=43)<br/>OR (95% CI)</b> |
|---------------------------------|----------------------------------------------|-------------------------------------------------------------------------|--------------------------------------------------------------------------|--------------------------------------------|
| <b>Selected Covariates</b>      |                                              |                                                                         |                                                                          |                                            |
| Age                             | <b>1.04 (1.01-1.07)</b>                      | 1.00 (Reference)                                                        | 1.00 (0.98-1.03)                                                         | 0.98 (0.94-1.01)                           |
| Benzodiazepine Use <sup>a</sup> | 0.60 (0.33-1.09)                             | 1.00 (Reference)                                                        | 1.05 (0.72-1.53)                                                         | 1.43 (0.91-2.25)                           |
| Baseline HAM-D                  | 0.90 (0.80-1.01)                             | 1.00 (Reference)                                                        | <b>1.30 (1.19-1.42)</b>                                                  | <b>1.31 (1.17-1.47)</b>                    |
| Baseline QIDS-SR                | <b>0.79 (0.71-0.88)</b>                      | 1.00 (Reference)                                                        | 1.02 (0.93-1.12)                                                         | <b>1.20 (1.05-1.38)</b>                    |
| <b>A priori covariate</b>       |                                              |                                                                         |                                                                          |                                            |
| TBS rTMS <sup>b</sup>           | 1.05 (0.55-2.03)                             | 1.00 (Reference)                                                        | 1.28 (0.71-2.30)                                                         | 1.77 (0.78-4.02)                           |

Abbreviations: HAM-D = 17-item Hamilton Depression Rating Scale, TBS = Theta burst stimulation, rTMS = Repetitive transcranial magnetic stimulation, QIDS-SR = Quick Inventory of Depressive Symptomatology, Self-Report, OR = Odds ratio, CI = Confidence interval.

Note: Bolded value indicates statistical significance at p<0.05

<sup>a</sup> Benzodiazepine use is included in the model as a continuous covariate with all daily benzodiazepine doses converted to lorazepam equivalents

<sup>b</sup> Reference is high frequency left stimulation technique

**FIGURE S1 A.** Three distinct trajectories of depressive symptom changes over six weeks of repetitive transcranial magnetic stimulation treatment for the high-frequency left stimulation group (n=189). Note that trajectories were determined using 4 week data, we extended participant depressive symptom data to week 6 for descriptive purposes as the number of trajectories identified using week 4 and week 6 data was identical (three) with good inter-rater agreement ( $\kappa=0.83$ ). (HAM-D = Hamilton Depression Rating Scale, 17-Item).

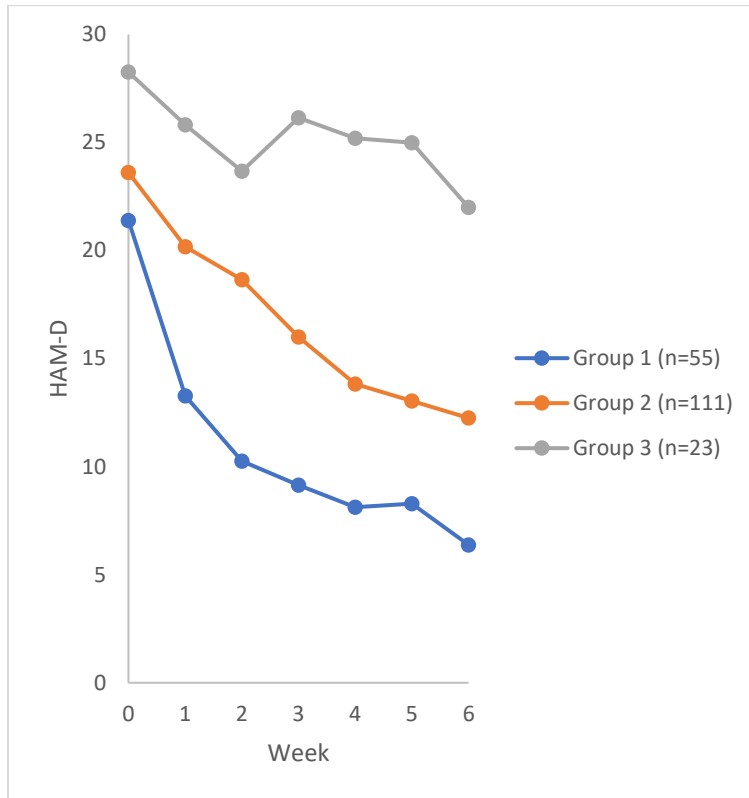

**Figure S1 B.** Three distinct trajectories of depressive symptom changes over six weeks of repetitive transcranial magnetic stimulation treatment for the intermittent theta burst group (n=199). Note that the optimal number of trajectories for week 4 data was three, while for week 6 data was four. We calculated the inter-rater agreement between week 4 and week 6 data assuming three response trajectories and found good inter-rater agreement ( $\kappa=0.82$ ). Therefore, we extended participant depressive symptom data to week 6 for descriptive purposes. (HAM-D = Hamilton Depression Rating Scale, 17-Item).

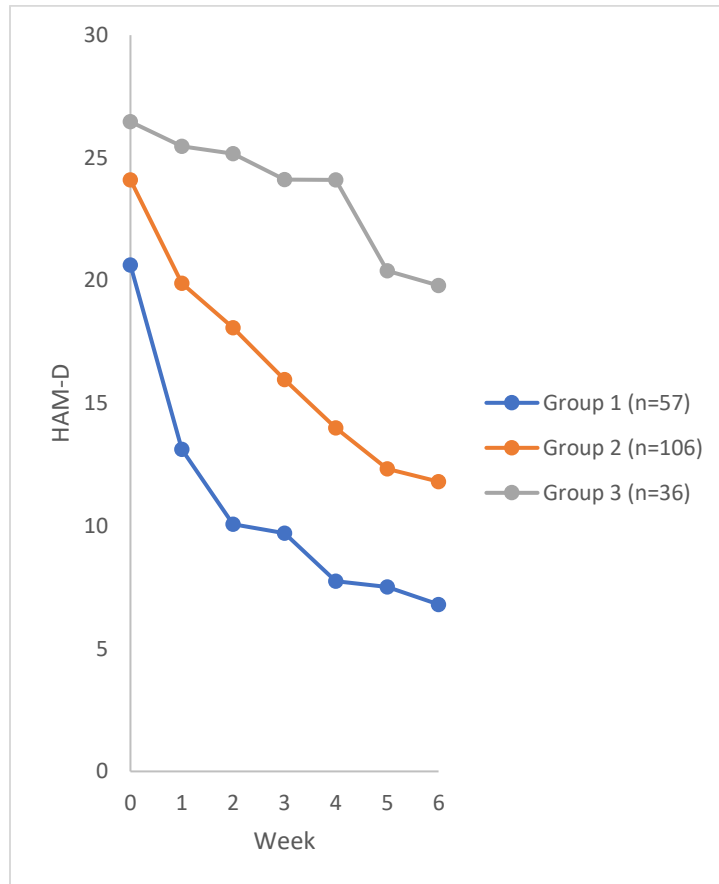

Supplement: appi.ajp.2018.18091096.ds001.pdf [file appi.ajp.2018.18091096.ds001.pdf]
