# Supplementary material for: Trajectories of Response to Dorsolateral Prefrontal rTMS in Major Depression: A THREE-D Study
Source: Atypon-hosted journal article supplement (doi:10.1176/appi.ajp.2018.18091096), 2019-02-15
Supplement: appi.ajp.2018.18091096.ds001.pdf [file appi.ajp.2018.18091096.ds001.pdf]

 


Psychiatry Online
